# Supplementary material
Source: MDPI journal article supplement (https://www.mdpi.com/2304-6740/11/6/236)
Supplement: s1 [file s1]

## Supporting Information

**Table S1.** Mass loading of Pt in the synthesized Pt<sub>n</sub>/Ni(OH)<sub>2</sub> NSs.

| Samples                               | Pt loading (wt.%) |
|---------------------------------------|-------------------|
| Pt <sub>5</sub> /Ni(OH) <sub>2</sub>  | 11.48             |
| Pt <sub>10</sub> /Ni(OH) <sub>2</sub> | 22.01             |
| Pt <sub>15</sub> /Ni(OH) <sub>2</sub> | 29.50             |
| Pt <sub>20</sub> /Ni(OH) <sub>2</sub> | 35.83             |

**Table S2.** BET specific surface area of synthesized Ni(OH)<sub>2</sub> NSs and Pt<sub>n</sub>/Ni(OH)<sub>2</sub> NSs.

| Samples                               | BET specific surface area(m <sup>2</sup> /g) |
|---------------------------------------|----------------------------------------------|
| Ni(OH) <sub>2</sub>                   | 57.67                                        |
| Pt <sub>5</sub> /Ni(OH) <sub>2</sub>  | 62.48                                        |
| Pt <sub>10</sub> /Ni(OH) <sub>2</sub> | 104.47                                       |
| Pt <sub>15</sub> /Ni(OH) <sub>2</sub> | 87.50                                        |
| Pt <sub>20</sub> /Ni(OH) <sub>2</sub> | 84.48                                        |

**Table S3.** Reaction rate constant  $k$ , mass normalized reaction rate constant  $k_m$  and conversions of 4-NP at 10 min catalyzed by Pt<sub>n</sub>/Ni(OH)<sub>2</sub> NSs and commercial Pt/C.

| Samples                               | $k$ (s <sup>-1</sup> ) | $k_m$ (s <sup>-1</sup> ·g <sup>-1</sup> ) | Conversion (%) |
|---------------------------------------|------------------------|-------------------------------------------|----------------|
| Pt/C                                  | 0.00967                | 96.70                                     | 98.4           |
| Pt <sub>5</sub> /Ni(OH) <sub>2</sub>  | 0.01289                | 224.56                                    | 99.5           |
| Pt <sub>10</sub> /Ni(OH) <sub>2</sub> | 0.02358                | 214.27                                    | 99.8           |
| Pt <sub>15</sub> /Ni(OH) <sub>2</sub> | 0.02294                | 155.53                                    | 99.8           |
| Pt <sub>20</sub> /Ni(OH) <sub>2</sub> | 0.01973                | 110.13                                    | 99.6           |

**Table S4.** Statistical analysis of conversion of 10 reaction cycles of Pt<sub>n</sub>/Ni(OH)<sub>2</sub> NSs with different Pt loading.

| <b>Samples</b>                        | <b>Mean of conversion</b> | <b>Variance of conversion</b> | <b>Standard deviation of conversion</b> |
|---------------------------------------|---------------------------|-------------------------------|-----------------------------------------|
| Pt <sub>5</sub> /Ni(OH) <sub>2</sub>  | 98.92                     | 0.56                          | 0.75                                    |
| Pt <sub>10</sub> /Ni(OH) <sub>2</sub> | 99.27                     | 0.21                          | 0.46                                    |
| Pt <sub>15</sub> /Ni(OH) <sub>2</sub> | 99.34                     | 0.59                          | 0.77                                    |
| Pt <sub>20</sub> /Ni(OH) <sub>2</sub> | 95.38                     | 7.84                          | 2.80                                    |

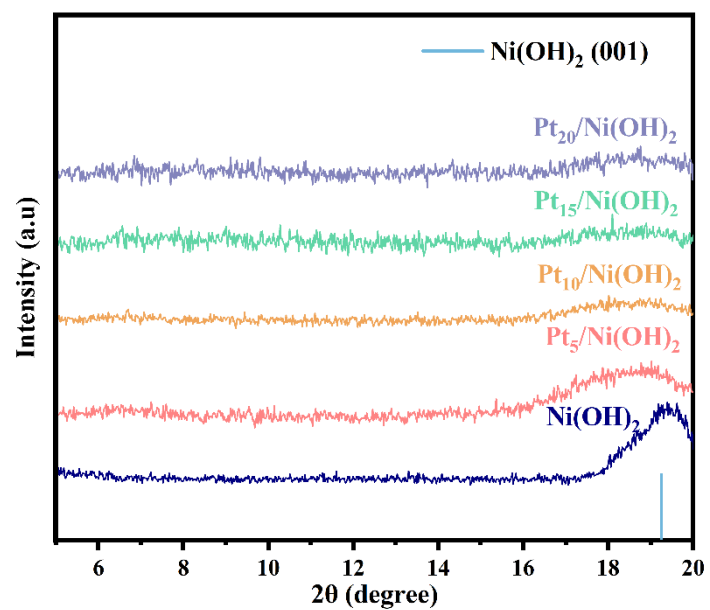

**Figure S1.** Magnified XRD patterns for as-prepared Ni(OH)<sub>2</sub> NSs and Pt<sub>n</sub>/Ni(OH)<sub>2</sub> NSs with different Pt loading.

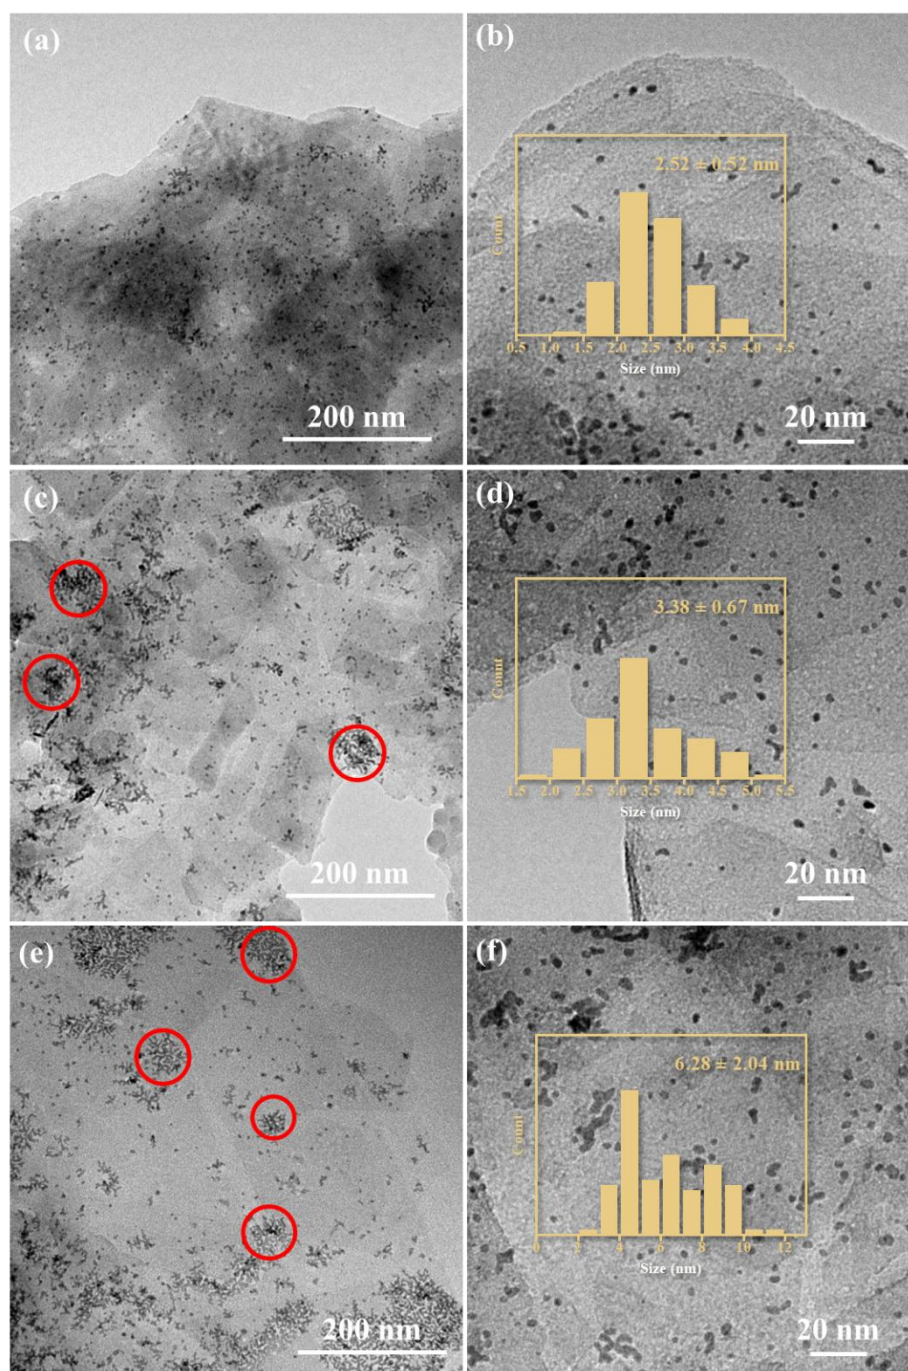

**Figure S2.** TEM images and particle size distributions of **(a-b)** Pt<sub>5</sub>/Ni(OH)<sub>2</sub> NSs, **(c-d)** Pt<sub>15</sub>/Ni(OH)<sub>2</sub> NSs, and **(e-f)** Pt<sub>20</sub>/Ni(OH)<sub>2</sub> NSs.

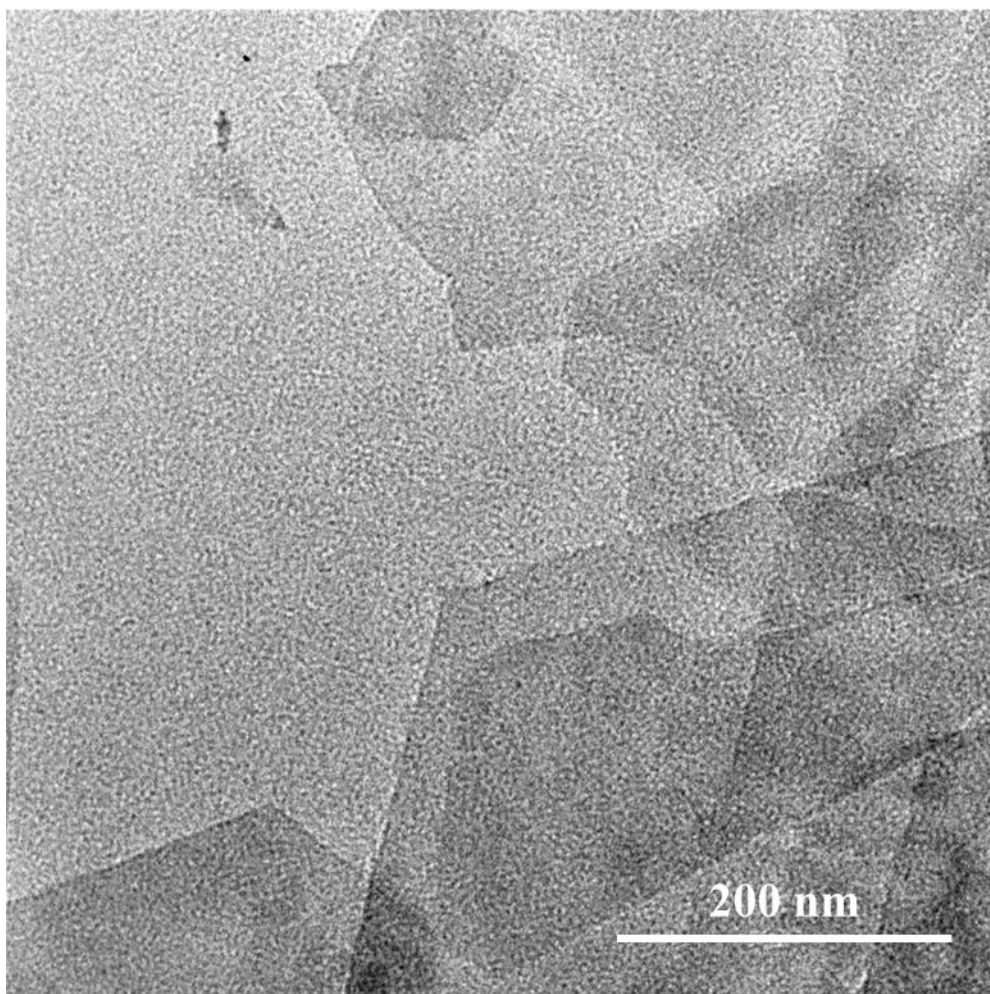

**Figure S3.** TEM images of Ni(OH)<sub>2</sub> NSs.

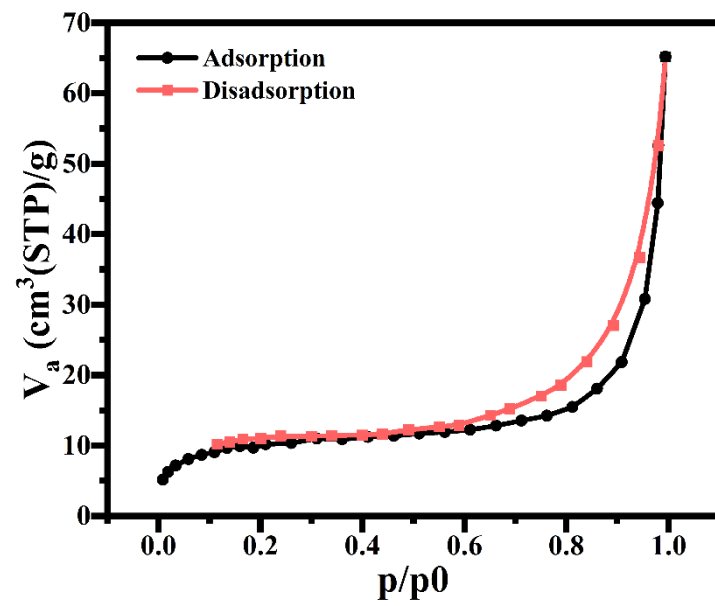

**Figure S4.** Nitrogen adsorption–desorption isotherm of Pt<sub>10</sub>/Ni(OH)<sub>2</sub> NSs.
